# Supplementary material for: Complementary DNA Significantly Enhancing Signal Response and Sensitivity of a Molecular Beacon Probe to Aflatoxin B1
Source: Biosensors (Basel). 2023 Jan 28;13(2):195. doi: 10.3390/bios13020195 (PMC9953557; doi:10.3390/bios13020195)
Supplement: Supplementary file 1 [file biosensors-13-00195-s001.zip › biosensors-2116089-supplementary.pdf]

## **Electronic Supplementary Material**

### **Complementary DNA significantly enhanced signal response and sensitivity of a molecular beacon probe to aflatoxin B1**

**Chao Wang <sup>1</sup>, Kexiao Zhu <sup>2</sup>, Jie Yu <sup>2</sup> and Pengfei Shi <sup>1,\*</sup>**

1 College of Medicine, Linyi University, Linyi 276005, China

2 College of Chemistry and Chemical Engineering, Linyi University, Linyi 276005, China

\* Correspondence: shipengfei913@163.com;

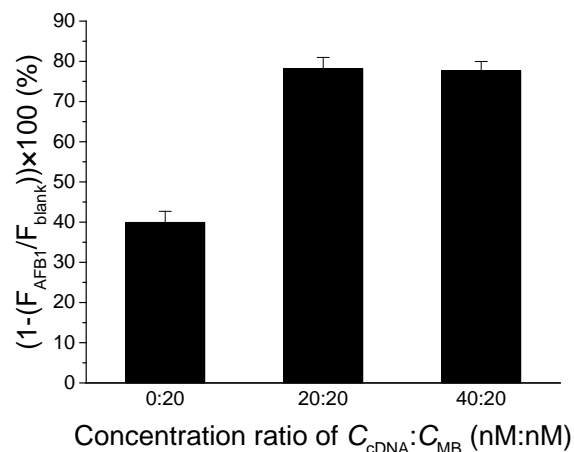

**Fig. S1.** Selection of concentration ratio between molecular beacon and complementary DNA strand. Assay buffer (pH 7.5) containing 20 mM Tris-HCl, 20 mM MgCl<sub>2</sub>, 200 mM NaCl and 0.1% (v/v) tween20 was used. AFB1 concentration was 500 nM. Excitation/emission was 485 nm/518 nm. Incubation at 4 °C was applied.

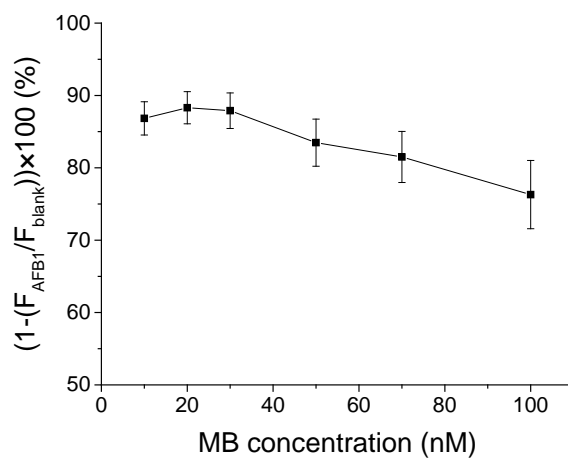

**Fig. S2.** Selection of MB concentration. Assay buffer (pH 7.5) containing 20 mM Tris-HCl, 20 mM MgCl<sub>2</sub>, 200 mM NaCl and 0.1% (v/v) tween20 was used. MB probe concentration was 20 nM. cDNA concentration was 20 nM, AFB1 concentration was 500 nM. Excitation/emission was 485 nm/518 nm. Incubation at 4 °C was applied.

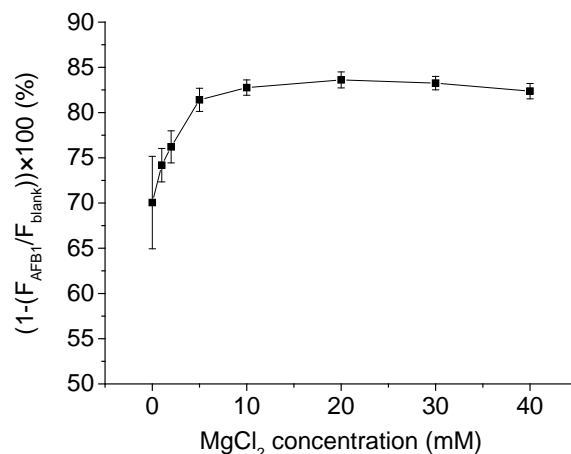

**Fig. S3.** Optimization of MgCl<sub>2</sub> concentration in assay buffer. Assay buffer (pH 7.5) containing 20 mM Tris-HCl, 200 mM NaCl, 0.1% (v/v) tween20 and different MgCl<sub>2</sub> concentrations was used. MB probe concentration was 20 nM, cDNA concentration was 20 nM, AFB1 concentration was 500 nM. Excitation/emission was 485 nm/518 nm. Incubation at 4 °C was applied.

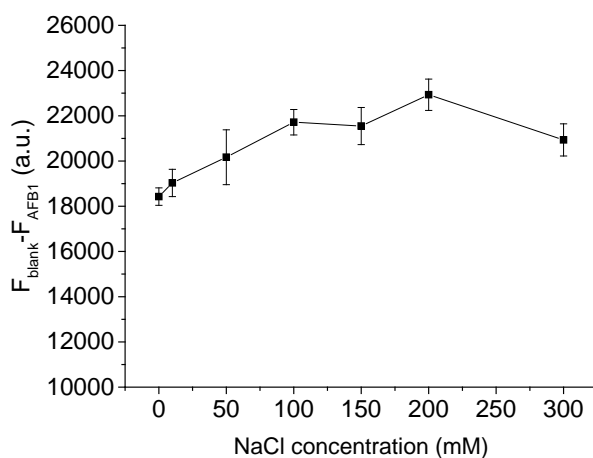

**Fig. S4.** Effects of NaCl concentration in assay buffer on detection performance. Assay buffer (pH 7.5) containing 20 mM Tris-HCl, 20 mM MgCl<sub>2</sub>, 0.1% (v/v) tween20 and different NaCl concentrations was used. MB probe concentration was 20 nM. cDNA concentration was 20 nM, AFB1 concentration was 500 nM. Excitation/emission was 485 nm/518 nm. Incubation at 4 °C was applied.

**Table S1** Comparison of some aptamer-based sensors for AFB1

| Strategies                                                                            | Detection range    | LOD    | References |
|---------------------------------------------------------------------------------------|--------------------|--------|------------|
| Assay using fluorescein-labeled aptamer and quencher labeled complementary DNA (cDNA) | 16-320 nM          | 5.1 nM | [1]        |
| Fluorescent aptasensor using AIEgens and graphene oxide                               | 0.8-10 nM          | 0.8 nM | [2]        |
| FRET-based aptasensor                                                                 | 10-400 nM          | 3.4 nM | [3]        |
| Aptamer with dual-terminal proximity structures                                       | 3.2-3200 nM        | 2.9 nM | [4]        |
| Assay using a quencher system composed of quantum dots and graphene oxide             | 3.2 nM-320 $\mu$ M | 1.0 nM | [5]        |
| Aptamer assay using aggregation-induced emission dyes                                 | 1.0 nM-16 $\mu$ M  | 1.0 nM | [6]        |
| An aptamer-based lateral flow strip                                                   | --                 | 0.3 nM | [7]        |
| A simple molecular beacon probe enhanced with cDNA                                    | 1 nM-3 $\mu$ M     | 1 nM   | This work  |

## References

1. Chen, L.; Wen, F.; Li, M.; Guo, X.; Li, S.; Zheng, N.; Wang, J., A simple aptamer-based fluorescent assay for the detection of aflatoxin B1 in infant rice cereal. *Food chemistry* **2017**, 215, 377-382.
2. Jia, Y.; Wu, F.; Liu, P.; Zhou, G.; Yu, B.; Lou, X.; Xia, F., A label-free fluorescent aptasensor for the detection of aflatoxin B1 in food samples using AIEgens and graphene oxide. *Talanta* **2019**, 198, 71-77.
3. Sabet, F. S.; Hosseini, M.; Khabbaz, H.; Dadmehr, M.; Ganjali, M. R., FRET-based aptamer biosensor for selective and sensitive detection of aflatoxin B1 in peanut and rice. *Food chemistry* **2017**, 220, 527-532.
4. Xia, X.; Wang, Y.; Yang, H.; Dong, Y.; Zhang, K.; Lu, Y.; Deng, R.; He, Q., Enzyme-free amplified and ultrafast detection of aflatoxin B1 using dual-terminal proximity aptamer probes. *Food chemistry* **2019**, 283, 32-38.

- 
5. Lu, Z.; Chen, X.; Wang, Y.; Zheng, X.; Li, C. M., Aptamer based fluorescence recovery assay for aflatoxin B1 using a quencher system composed of quantum dots and graphene oxide. *Microchimica Acta* **2014**, 182, 571-578.
  6. Zhao, Z.; Yang, H.; Deng, S.; Dong, Y.; Yan, B.; Zhang, K.; Deng, R.; He, Q., Intrinsic conformation response-leveraged aptamer probe based on aggregation-induced emission dyes for aflatoxin B1 detection. *Dyes and Pigments* **2019**, 171, 107767.
  7. Mousivand, M.; Javan-Nikkhah, M.; Anfossi, L.; Di Nardo, F.; Salina, M.; Bagherzadeh, K., High performance aptasensing platform development through in silico aptamer engineering for aflatoxin B1 monitoring. *Food Control* **2023**, 145, 109418.
